# Supplementary material
Source: PubMed Central journal article supplement (PMC3554063)
Supplement: JVI.01103-12_zjv999097142so1.pdf [file JVI.01103-12_zjv999097142so1.pdf]

## **Supplementary Figures**

### **Figure S1**

The distribution of ND10 components in uninduced cells. The panels show the separated channels (as indicated) of the images in Figure 4A. The upper and lower paired images in the uppermost double row are taken from the uppermost row of Figure 4A, and each subsequent row of paired images are taken from the other rows of Figure 4A in descending order. The identities of the images are also indicated on the right.

### **Figure S2**

The distribution of ND10 components in induced cells. The panels show the separated channels (as indicated) of the images in Figure 4B. The upper and lower paired images in the uppermost double row are taken from the uppermost row of Figure 4B, and each subsequent row of paired images are taken from the other rows of Figure 4B in descending order. The identities of the images are also indicated on the right.

### **Figure S3**

Recruitment of ND10 components to sites associated with ICP0 null mutant HSV-1 genomes in uninduced cells. Cells were infected with ICP0 null mutant HSV-1 at appropriate multiplicities, then stained for ICP4 and the indicated cellular proteins the following day. The panels show the separated channels (as indicated) of the images in Figure 8A. The upper and lower paired images in the uppermost double row are taken from the uppermost row of Figure 8A, and each subsequent row of paired images are taken from the other rows of Figure 8A in descending order. The identities of the images are also indicated on the right.

### **Figure S4**

Recruitment of ND10 components to sites associated with ICP0 null mutant HSV-1 genomes in induced cells. Cells were infected with ICP0 null mutant HSV-1 at appropriate multiplicities, then stained for ICP4 and the indicated cellular proteins the following day. The panels show the separated channels (as indicated) of the images in Figure 8B. The upper and lower paired images in the uppermost double row are taken from the uppermost row of Figure 8B, and each subsequent row of paired images are taken from the other rows of Figure 8B in descending order. The identities of the images are also indicated on the right.

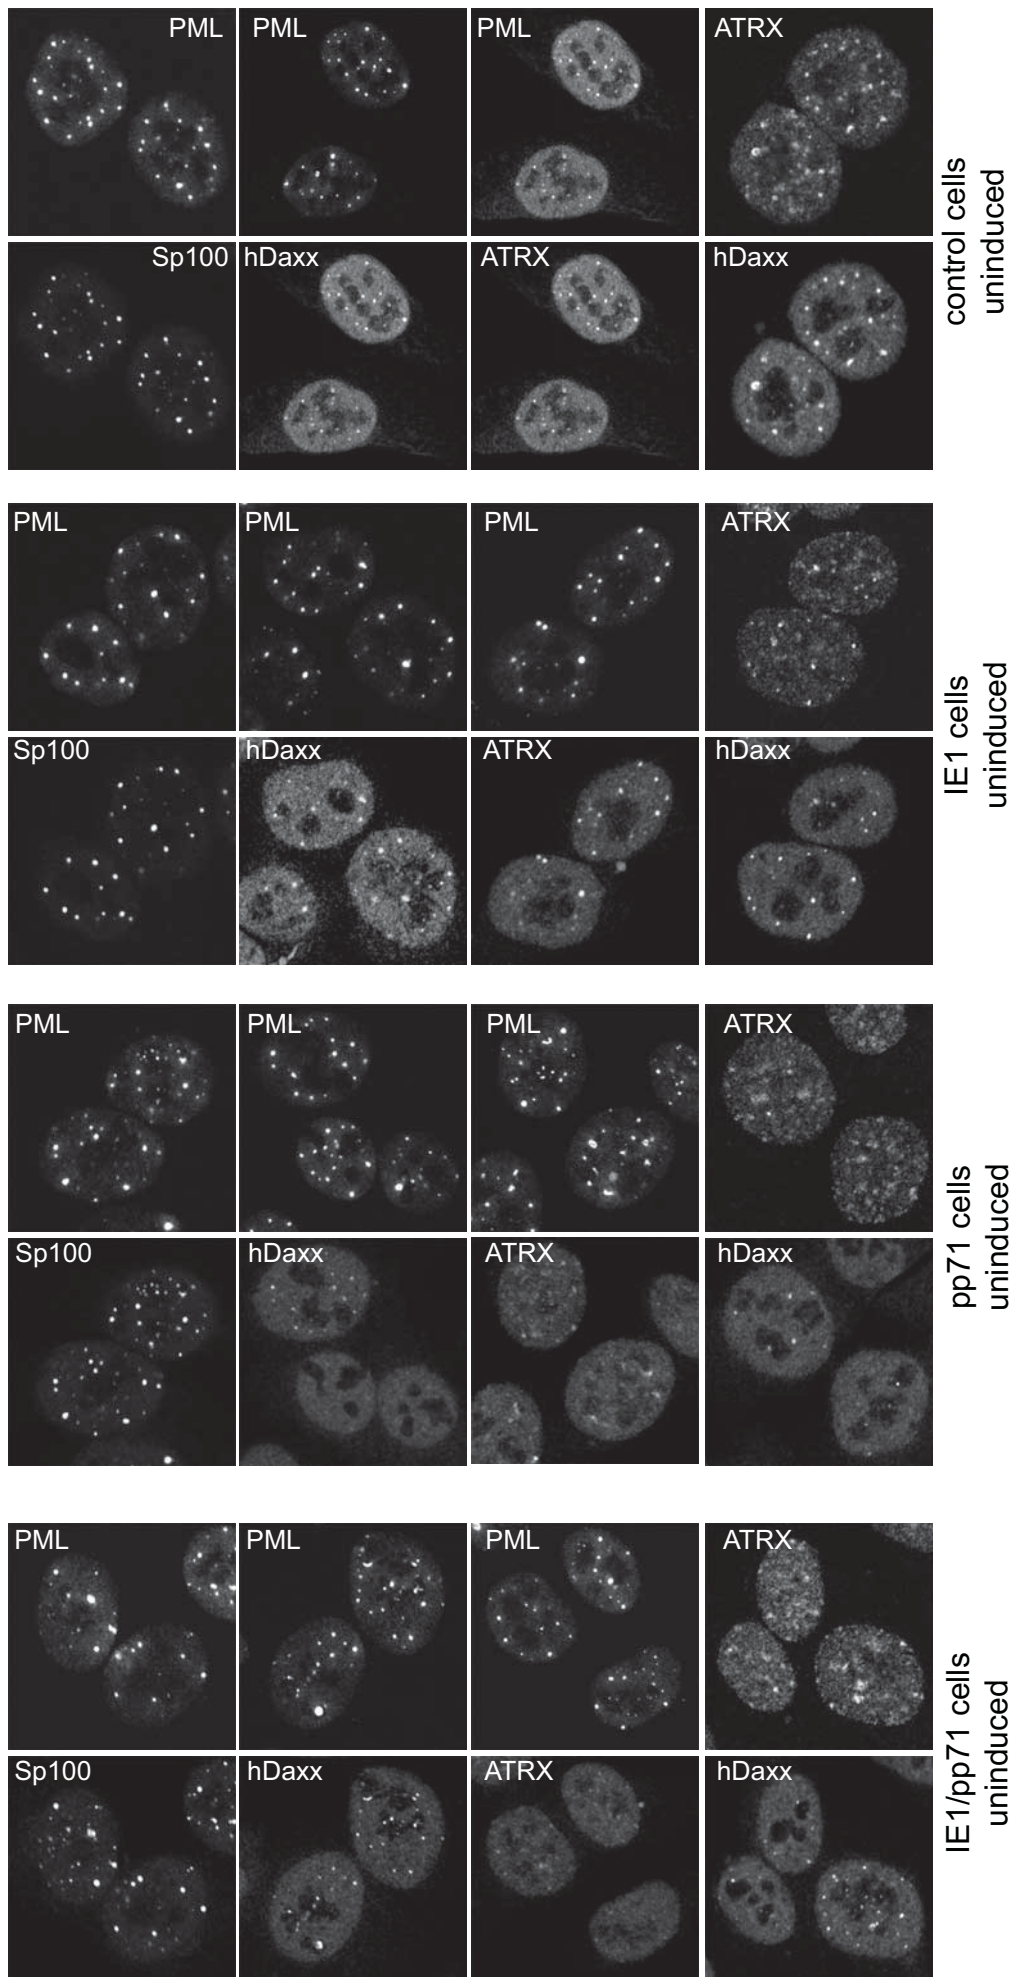

Figure S1

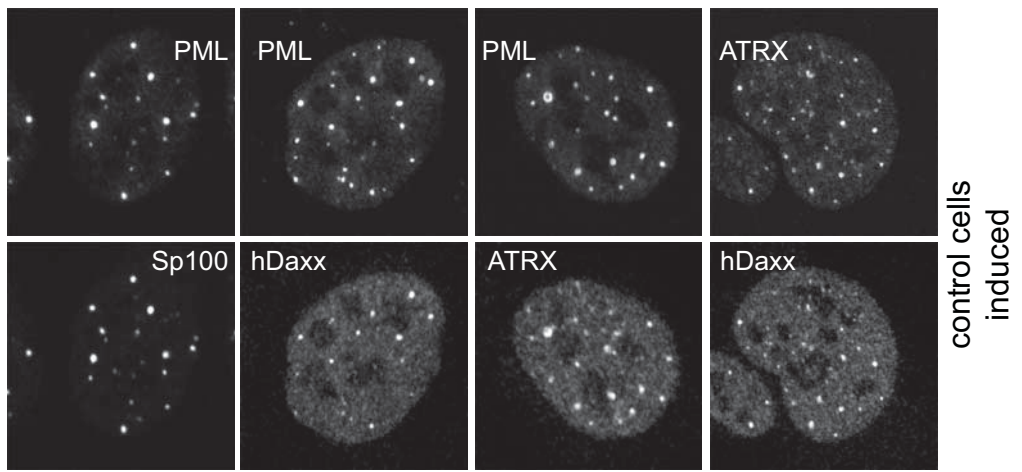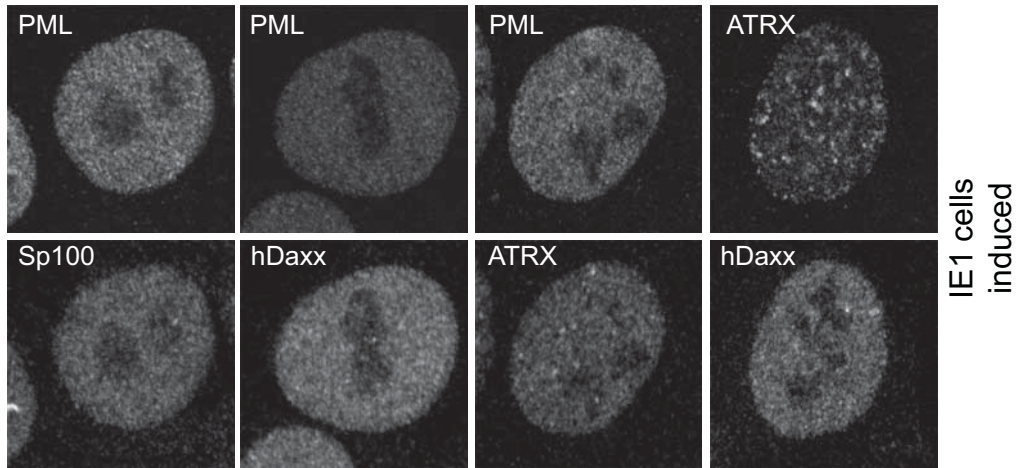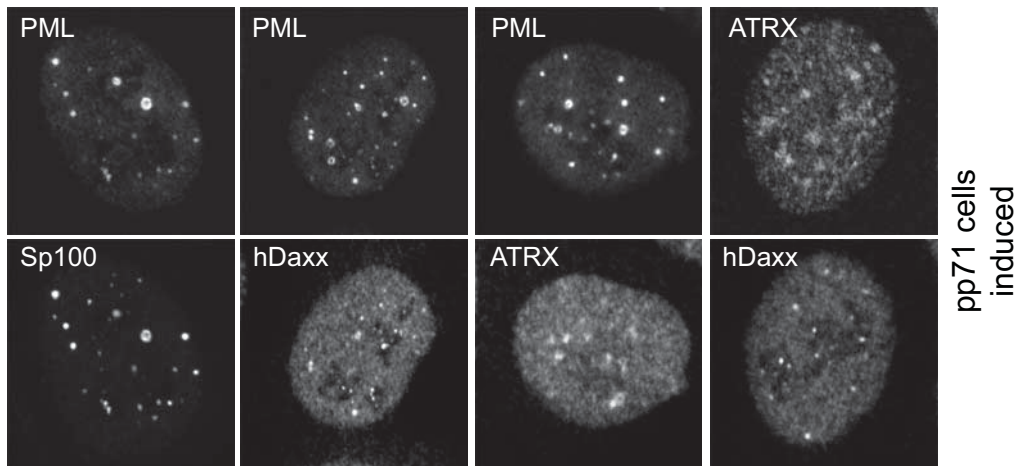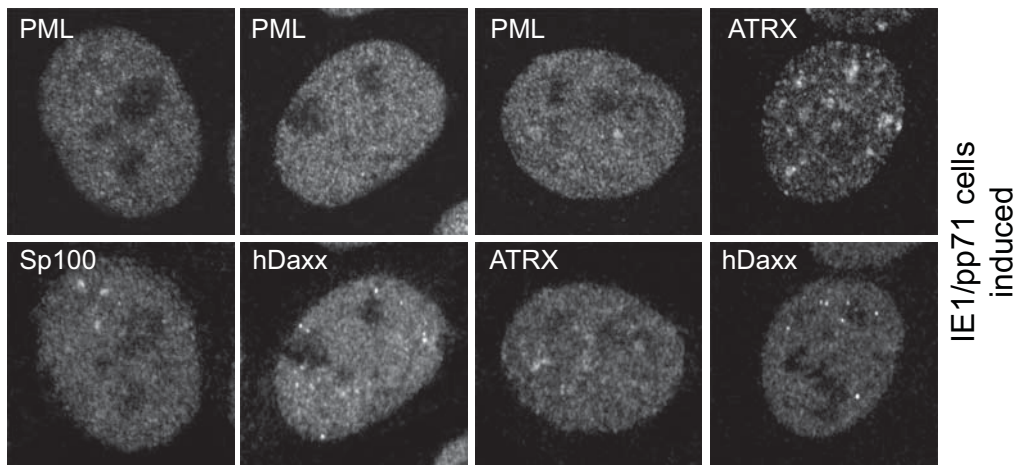

Figure S2

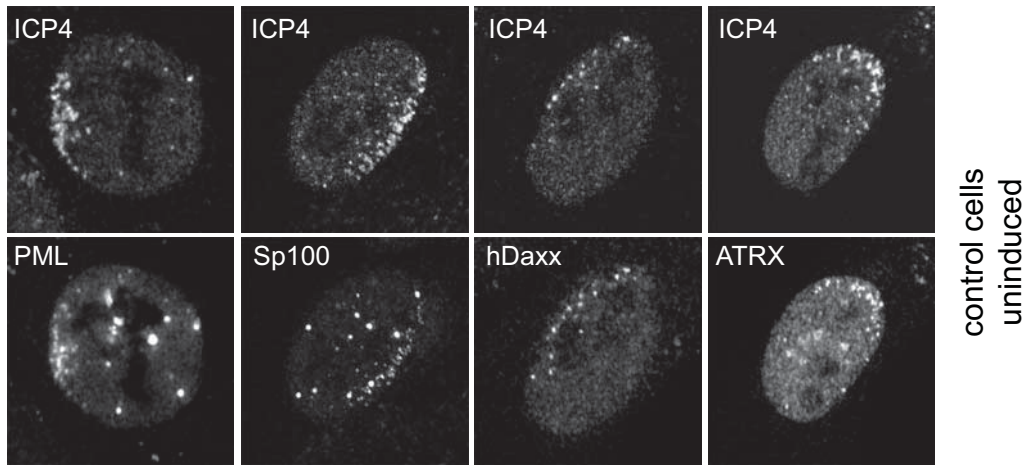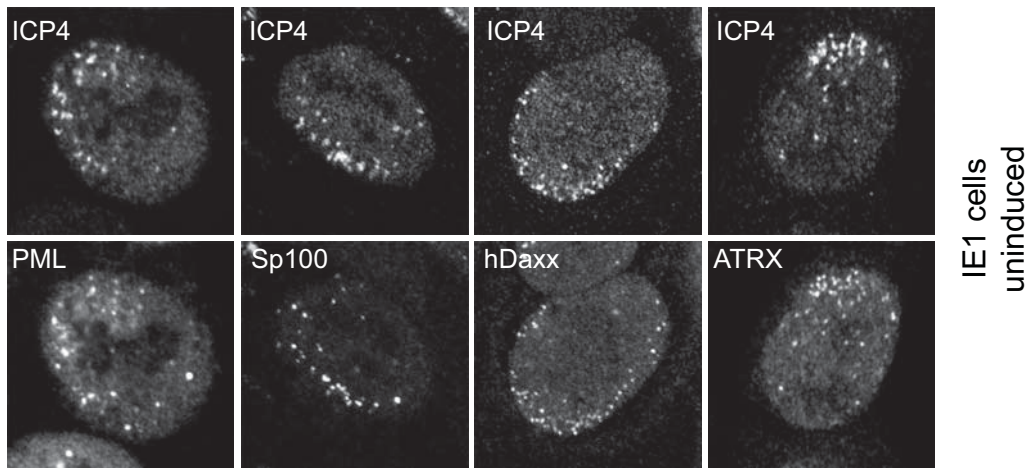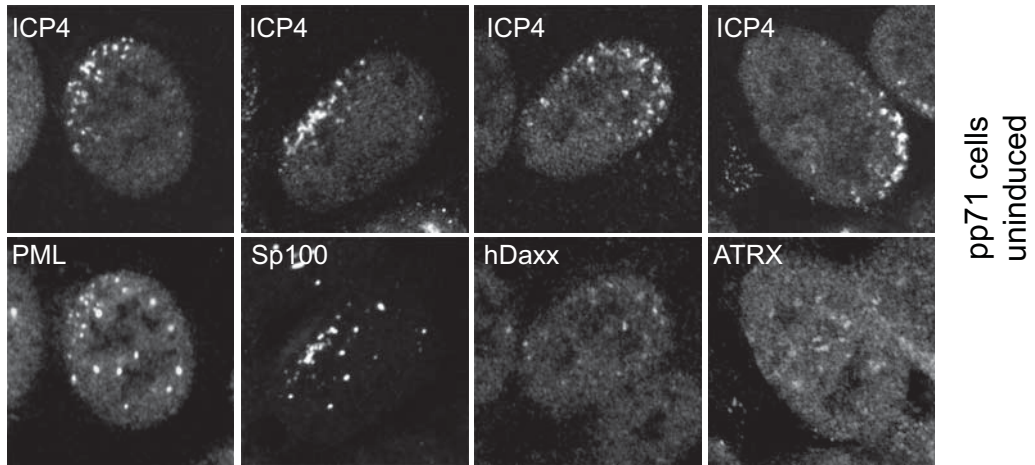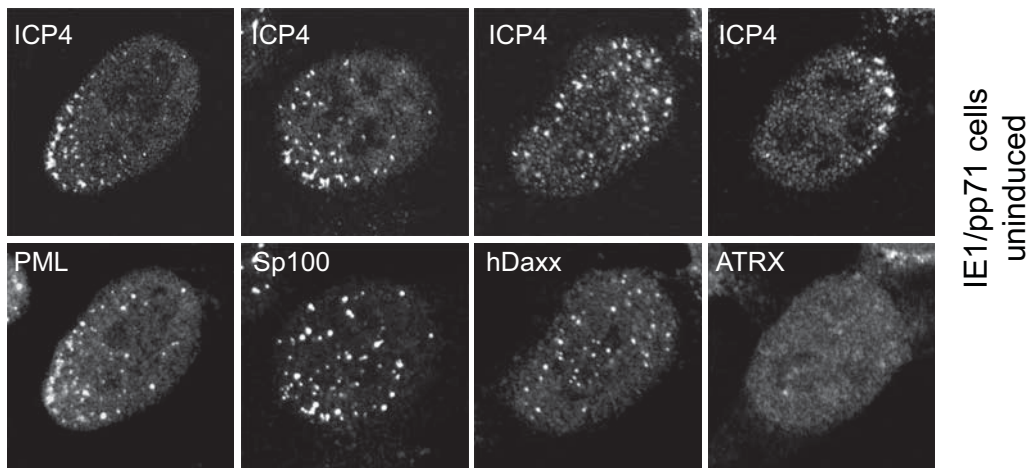

Figure S3

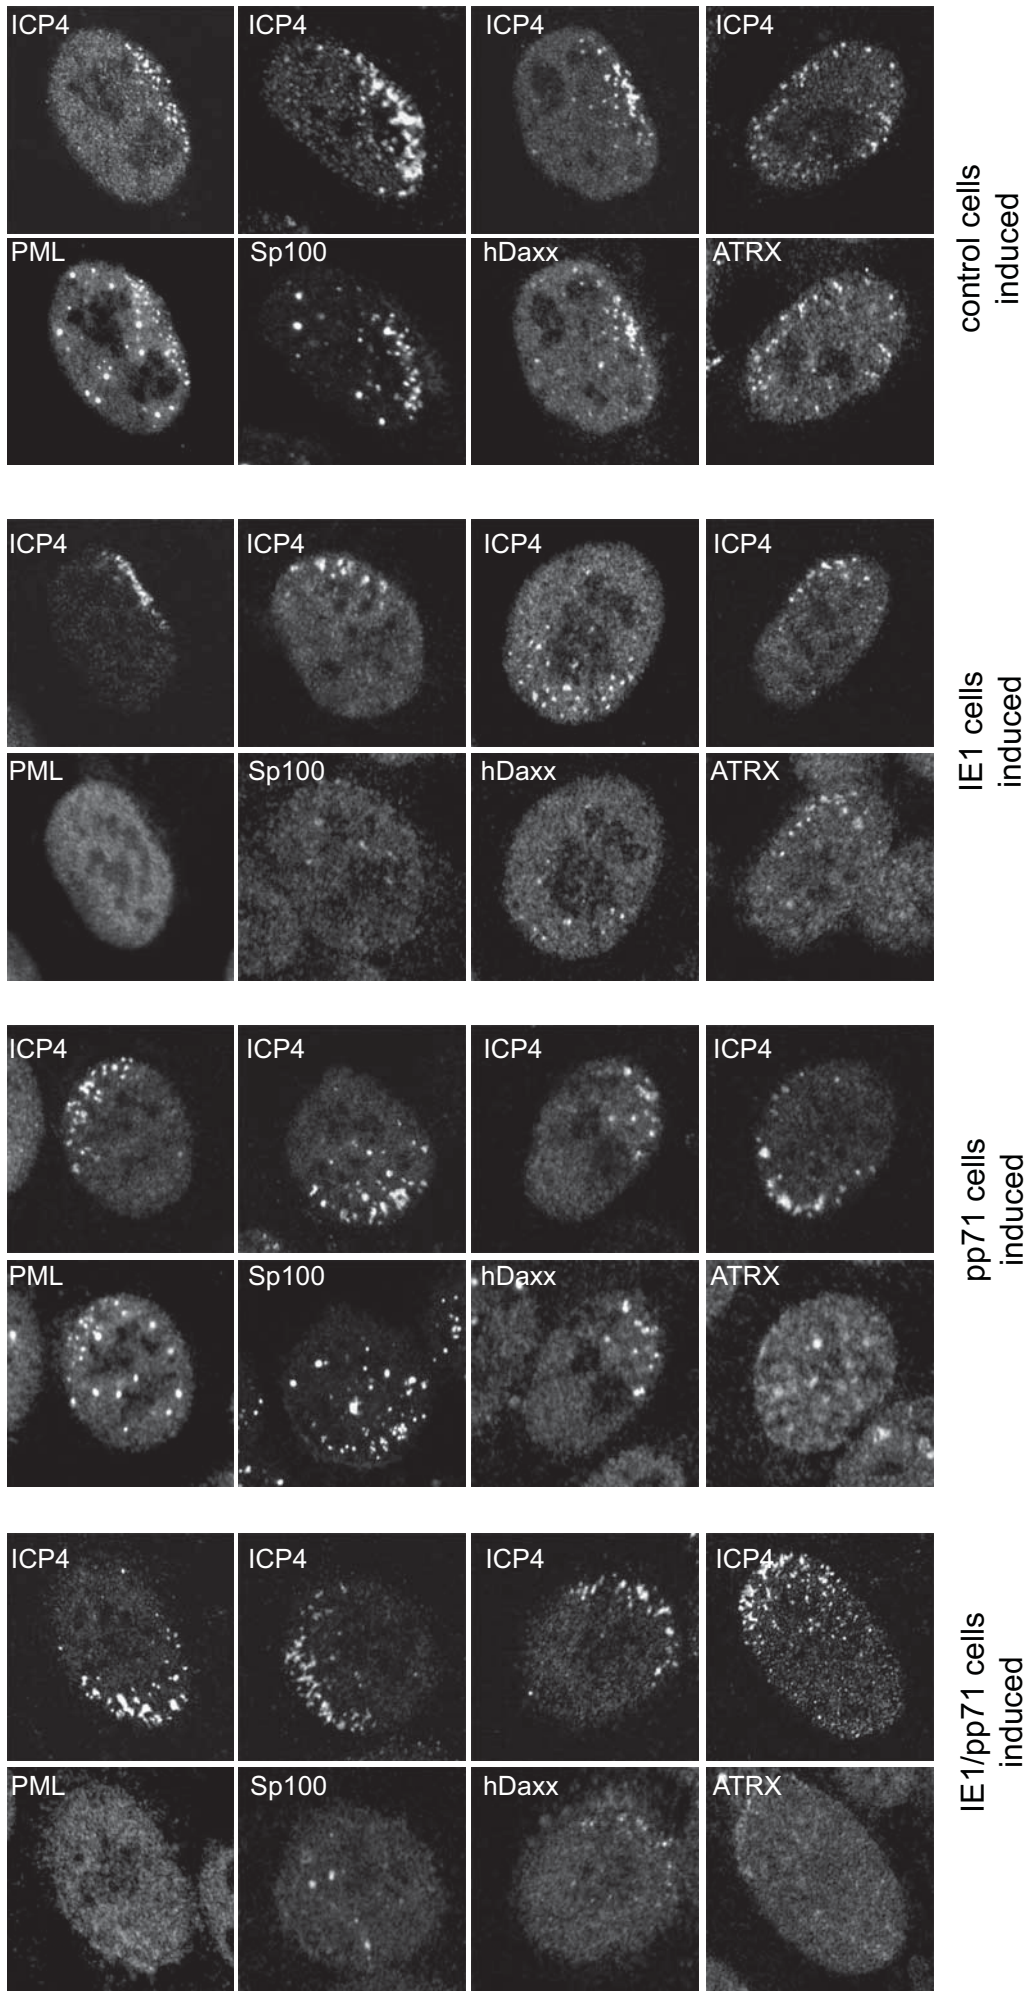

Figure S4
